# Supplementary material for: A balanced measure shows superior performance of pseudobulk methods in single-cell RNA-sequencing analysis
Source: PubMed Central journal article supplement (PMC9780232; doi:10.1038/s41467-022-35519-4), 2022-12-22
Supplement: 41467_2022_35519_MOESM1_ESM.pdf [file 41467_2022_35519_MOESM1_ESM.pdf]

**A balanced measure shows superior performance of pseudobulk methods  
in single-cell RNA-sequencing analysis**

**Murphy *et al.***

**Supplementary Figures and Tables**

## Supplementary Figures

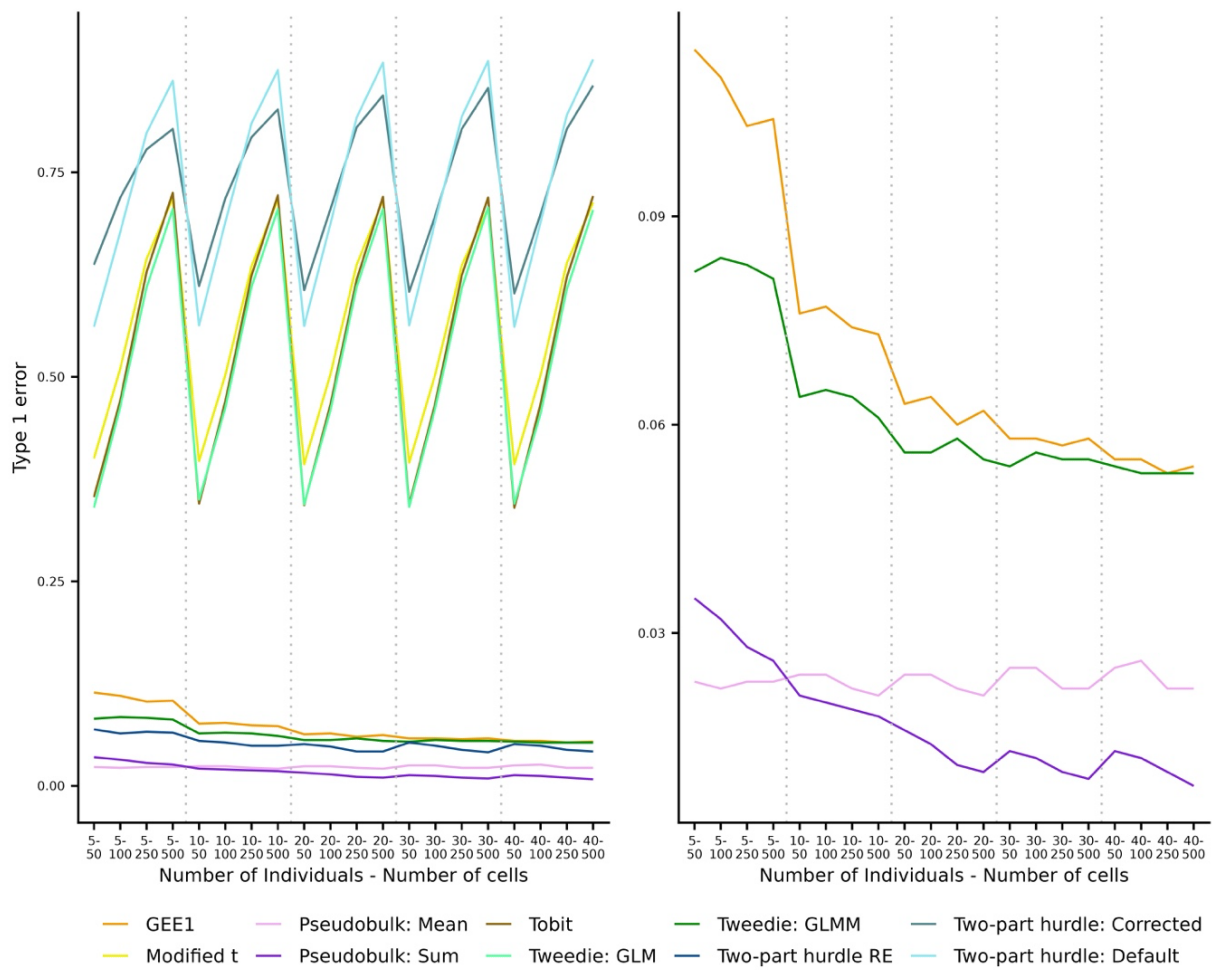

**Supplementary Figure 1:** The average type 1 error from the 20,000 iterations; 50 runs for each of the 5 to 40 individuals and 50 to 500 cells at a p-value cut-off of 0.05 on 5,000 genes reported by Zimmerman et al.<sup>1</sup>. Left shows all benchmarked models whereas right focuses on the top four approaches. The different models are pseudoreplication approaches; ‘Modified t’, ‘Tobit’, ‘Two-part hurdle: Default’, ‘Two-part hurdle: Corrected’, ‘GEE1’, ‘Tweedie: GLM’, pseudobulk approaches; ‘Pseudobulk: Mean’, ‘Pseudobulk: Sum’ and mixed model approaches; ‘Tweedie: GLMM’ and ‘Two-part hurdle: RE’. Source data are provided in the as a source data file and from the original publication<sup>1</sup>.

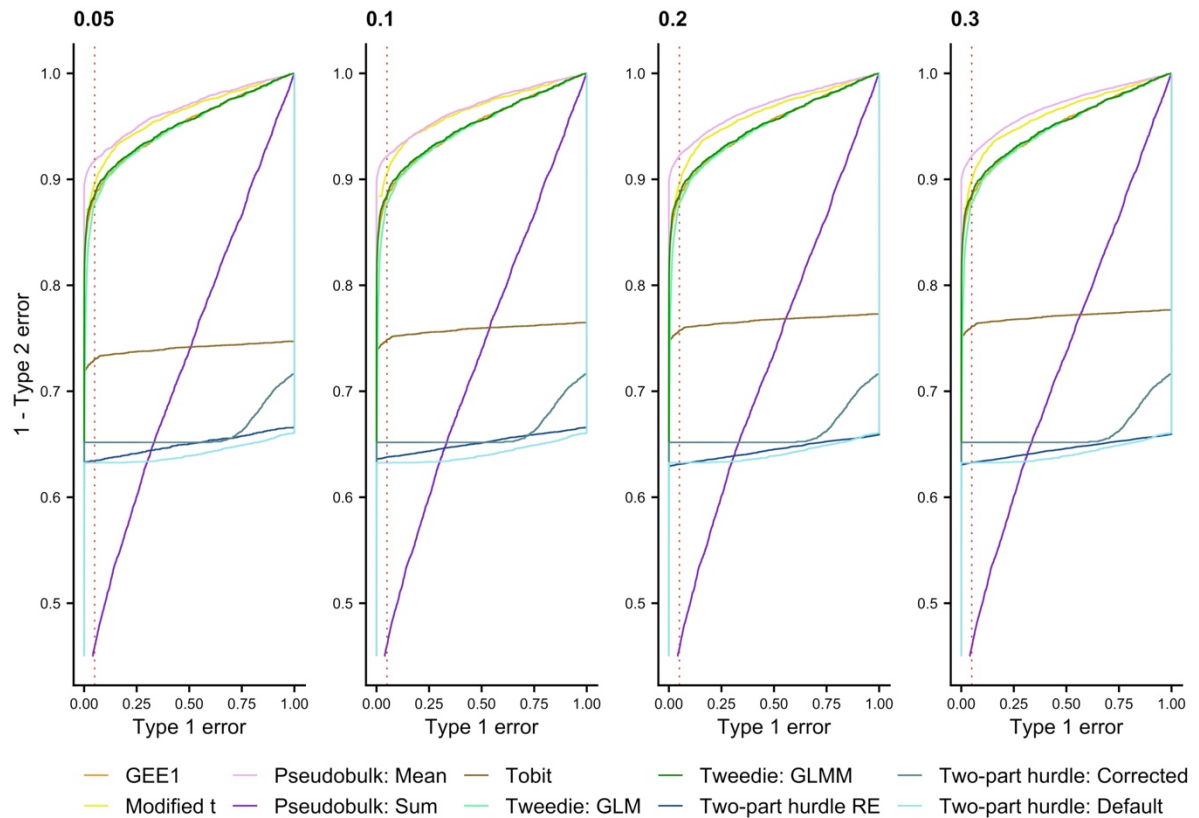

**Supplementary Figure 2:** *Pseudobulk mean is best performing at a constant type 1 error rate. The four images give the receiver operating characteristics (ROC) curve across 50 runs each for different proportions of simulated differentially expressed genes (DEGs) - 0.05, 0.1, 0.2, 0.3. 20 individuals were simulated for case and controls, each with 100 cells. The proportion of DEGs are of the 5,000 non-DEGs simulated. The sensitivity ( $1 - \text{type 2 error}$ ) of the different approaches at a 0.05 type 1 error value are highlighted by the red dashed line. The different models are pseudoreplication approaches; ‘Modified t’, ‘Tobit’, ‘Two-part hurdle: Default’, ‘Two-part hurdle: Corrected’, ‘GEE1’, ‘Tweedie: GLM’, pseudobulk approaches; ‘Pseudobulk: Mean’, ‘Pseudobulk: Sum’ and mixed model approaches; ‘Tweedie: GLMM’ and ‘Two-part hurdle: RE’. Source data are provided<sup>2</sup>.*

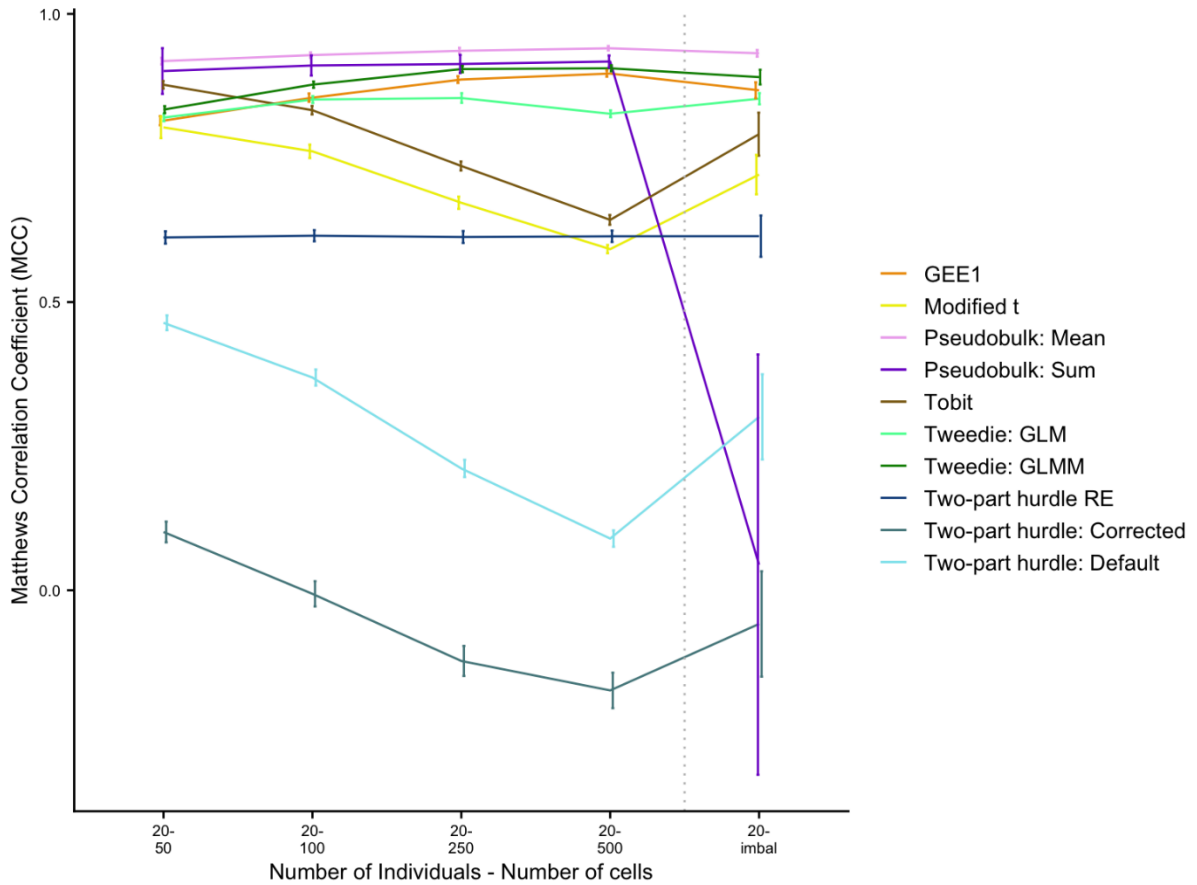

**Supplementary Figure 3:** The average Matthews correlation coefficient of all benchmarked models across all balanced number of cells and the imbalanced number of cells for 20 individuals; 50 runs for each at a  $p$ -value cut-off of 0.05 on 5,000 genes. The number of cells were randomly chosen using a gamma distribution with shape 4 and scale 45 separately for cases and controls to produce the imbalanced dataset (giving a mean 150-200 cells). The error bars give 1 standard deviation around the mean. The different models are pseudoreplication approaches; ‘Modified  $t$ ’, ‘Tobit’, ‘Two-part hurdle: Default’, ‘Two-part hurdle: Corrected’, ‘GEE1’, ‘Tweedie: GLM’, pseudobulk approaches; ‘Pseudobulk: Mean’, ‘Pseudobulk: Sum’ and mixed model approaches; ‘Tweedie: GLMM’ and ‘Two-part hurdle: RE’. Source data are provided as a Source Data file.

## Supplementary Tables

| Method                     | Description                                                                                      | Method Type       | Implementation |
|----------------------------|--------------------------------------------------------------------------------------------------|-------------------|----------------|
| GEE1                       | Generalised linear models - generalized estimating equation                                      | Pseudoreplication | geepack        |
| Modified t                 | Reproducibility-Optimized Statistical Testings (ROTS)                                            | Pseudoreplication | ROTS           |
| Pseudobulk: Mean           | Pseudobulk with mean aggregation                                                                 | Pseudobulk        | DESeq2         |
| Pseudobulk: Sum            | Pseudobulk with sum aggregation                                                                  | Pseudobulk        | DESeq2         |
| Tobit                      | Monocle                                                                                          | Pseudoreplication | Monocle        |
| Tweedie: GLM               | Generalised linear model with Tweedie distribution.                                              | Pseudoreplication | glmmTMB        |
| Tweedie: GLMM              | Generalised linear mixed-effects model with Tweedie distribution.                                | Mixed Model       | glmmTMB        |
| Two-part hurdle RE         | Model-based analysis of single-cell transcriptomics (MAST) with a random effect for individuals. | Mixed Model       | MAST           |
| Two-part hurdle: Corrected | MAST batch-corrected for individuals.                                                            | Pseudoreplication | MAST & ComBat  |
| Two-part hurdle: Default   | MAST without random effects.                                                                     | Pseudoreplication | MAST           |

**Supplementary Table 1:** *The different methods benchmarked in the analysis with their implementation approach and methodological types.*

| <b>Method</b>              | <b>0.05</b> | <b>0.1</b> | <b>0.2</b> | <b>0.3</b> |
|----------------------------|-------------|------------|------------|------------|
| GEE1                       | 0.950138    | 0.950138   | 0.950138   | 0.950138   |
| Modified t                 | 0.956821    | 0.960299   | 0.957801   | 0.957978   |
| Pseudobulk: Mean           | 0.965886    | 0.967704   | 0.968249   | 0.968664   |
| Pseudobulk: Sum            | 0.731316    | 0.731252   | 0.730117   | 0.729725   |
| Tobit                      | 0.740201    | 0.758228   | 0.76654    | 0.770334   |
| Tweedie: GLM               | 0.947437    | 0.947437   | 0.947437   | 0.947437   |
| Tweedie: GLMM              | 0.951053    | 0.951053   | 0.951053   | 0.951053   |
| Two-part hurdle RE         | 0.649905    | 0.651323   | 0.644665   | 0.645651   |
| Two-part hurdle: Corrected | 0.662429    | 0.662429   | 0.662429   | 0.662429   |
| Two-part hurdle: Default   | 0.641707    | 0.641707   | 0.641707   | 0.641707   |

**Supplementary Table 2:** *The area under the receiver operating characteristics curve (AUC) of all benchmarked models across different proportions of simulated differentially expressed genes (DEGs) - 0.05, 0.1, 0.2, 0.3. 20 individuals were simulated for case and controls, each with 100 cells. The proportion of DEGs are of the 5,000 non-DEGs simulated. The values are rounded to six decimal places. The different models are pseudoreplication approaches; ‘Modified t’, ‘Tobit’, ‘Two-part hurdle: Default’, ‘Two-part hurdle: Corrected’, ‘GEE1’, ‘Tweedie: GLM’, pseudobulk approaches; ‘Pseudobulk: Mean’, ‘Pseudobulk: Sum’ and mixed model approaches; ‘Tweedie: GLMM’ and ‘Two-part hurdle: RE’.*

## References

1. Zimmerman, K. D., Espeland, M. A. & Langefeld, C. D. A practical solution to pseudoreplication bias in single-cell studies. *Nat. Commun.* **12**, 738 (2021).
2. Murphy, A. *Al-Murphy/reanalysis\_scRNA\_seq\_benchmark: Reanalysis scRNA-seq benchmark*. (Zenodo, 2022). doi:10.5281/zenodo.7356243.
